# Supplementary material for: No impact of tropospheric ozone on the gross primary productivity of a Belgian pine forest
Source: Copernicus journal article supplement (doi:10.5194/bg-14-1839-2017), 2017-04-05
Supplement: Supplementary file [file bg-14-1839-2017-supplement-title-page.pdf › bg-14-1839-2017-supplement-title-page.pdf]

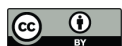

*Supplement of*

**No impact of tropospheric ozone on the gross primary productivity of a Belgian pine forest**

**Lore T. Verryckt et al.**

*Correspondence to:* Lore T. Verryckt ([lore.verryckt@uantwerpen.be](mailto:lore.verryckt@uantwerpen.be))

- [bg-14-1839-2017-supplement-title-page.pdf](#)
- [Dataset\\_CanopyModel\\_diffFormat2.xls](#)
- [Supplement.pdf](#)

The copyright of individual parts of the supplement might differ from the CC-BY 3.0 licence.
